# Supplementary material for: Chemical Profiles and Simultaneous Quantification of Aurantii fructus by Use of HPLC-Q-TOF-MS Combined with GC-MS and HPLC Methods
Source: PubMed Central journal article supplement (PMC6225099; doi:10.3390/molecules23092189), 2018-08-30
Supplement: molecules-23-02189-s001.pdf [file molecules-23-02189-s001.pdf]

*Supplementary Information*

## **Chemical Profiles and Simultaneous Quantification of *Aurantii Fructus* by Use of HPLC-Q-TOF-MS Combined with GC-MS and HPLC Methods**

**Yingjie He<sup>1,2,†</sup>, Zongkai Li<sup>3,†</sup>, Wei Wang<sup>2</sup>, Suren R. Sooranna<sup>4</sup>, Yiting Shi<sup>2</sup>, Yun Chen<sup>2</sup>, Changqiao Wu<sup>2</sup>, Jianguo Zeng<sup>1,2</sup>, Qi Tang<sup>1,2,\*</sup> and Hongqi Xie<sup>1,2,\*</sup>**

<sup>1</sup> Hunan Key Laboratory of Traditional Chinese Veterinary Medicine, Hunan Agricultural University, Changsha 410128, China; E-Mails: yingjiehe272@163.com (Y.H.); zengjianguo@hunau.edu.cn (J.Z.)

<sup>2</sup> National and Local Union Engineering Research Center for the Veterinary Herbal Medicine Resources and Initiative, Hunan Agricultural University, Changsha 410128, China; E-Mails: 18390946378@163.com (W.W.); erin643747964@163.com (Y.S.); m18250068565\_1@163.com (Y.C.); m15207494911@163.com (C.W.)

<sup>3</sup> School of Medicine, Guangxi University of Science and Technology, Liuzhou 565006, China; E-Mail: m13657294483\_1@163.com (Z.L.)

<sup>4</sup> Department of Surgery and Cancer, Chelsea and Westminster Hospital, Imperial College London, London SW10 9NH, UK; E-Mail: s.sooranna@imperial.ac.uk.

\* Correspondence: tangqi@hunau.edu.cn (Q.T.); xiehongqi2006@163.com (H.X.); Fax: +86-0731-8461-5293

† These authors contributed equally to this work.

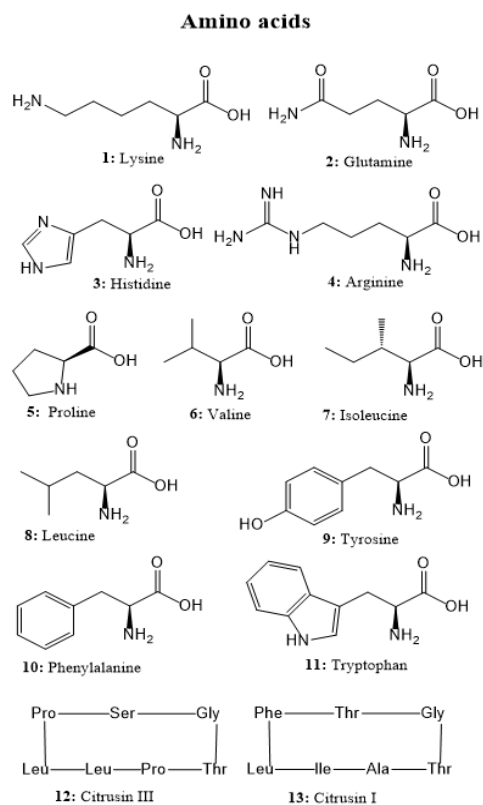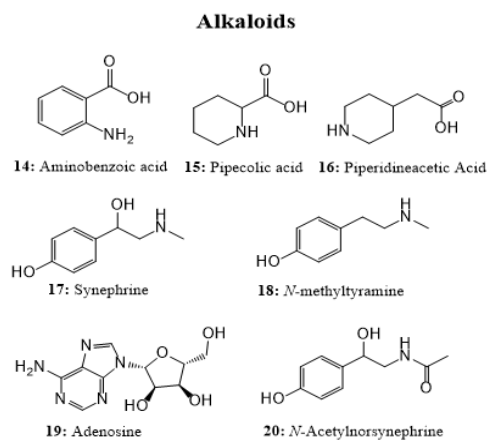

**Flavanones**

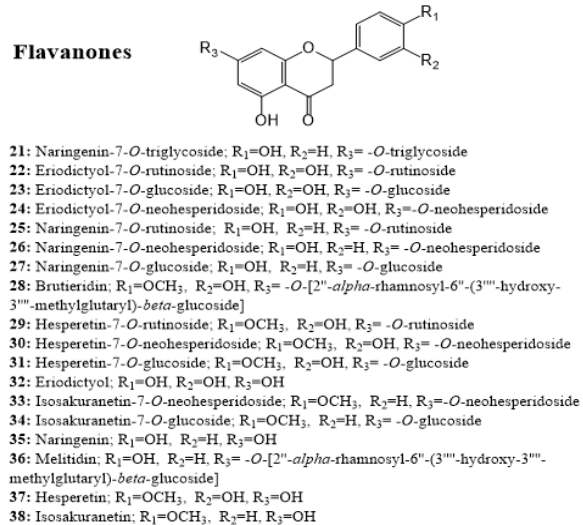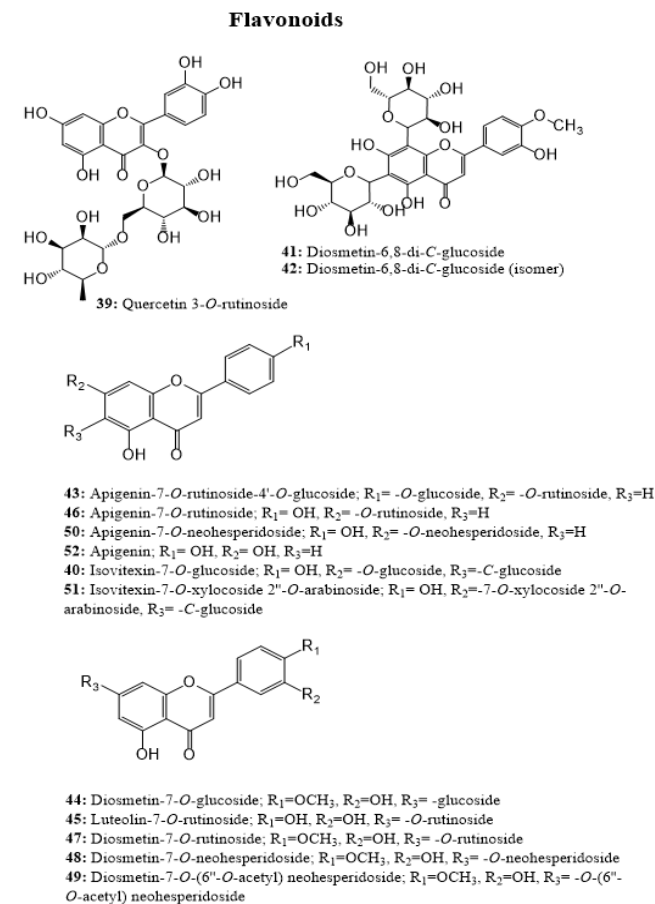

Figure S1. Structures of 86 compounds form ethanol extract of *Aurantii fructus*.

Figure S1. Cont.

**Polymethoxyflavonoids**

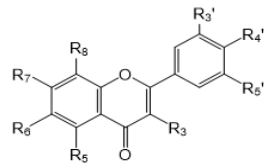

- 53: 3-Hydroxy-5,7,8-trimethoxyflavone;  $R_3=OH, R_5=OCH_3, R_6=H, R_7=OCH_3, R_8=OCH_3, R_3'=H, R_4'=H, R_5'=H$   
 54: 5-Hydroxy-6,7,3',4'-tetramethoxyflavone;  $R_3=H, R_5=OH, R_6=OCH_3, R_7=OCH_3, R_8=H, R_3'=OCH_3, R_4'=OCH_3, R_5'=H$   
 55: 5-Hydroxy-6,7,3',4',5'-pentamethoxyflavone;  $R_3=H, R_5=OH, R_6=OCH_3, R_7=OCH_3, R_8=H, R_3'=OCH_3, R_4'=OCH_3, R_5'=OCH_3$   
 56: 5,7,8,3',4'-Pentamethoxyflavone;  $R_3=H, R_5=OCH_3, R_6=H, R_7=OCH_3, R_8=OCH_3, R_3'=OCH_3, R_4'=OCH_3, R_5'=H$   
 57: 5,6,7,3',4'-Pentamethoxyflavone;  $R_3=H, R_5=OCH_3, R_6=OCH_3, R_7=OCH_3, R_8=H, R_3'=OCH_3, R_4'=OCH_3, R_5'=H$   
 58: 5-Hydroxy-6,7,8,3',4'-pentamethoxyflavone;  $R_3=H, R_5=OH, R_6=OCH_3, R_7=OCH_3, R_8=OCH_3, R_3'=OCH_3, R_4'=OCH_3, R_5'=H$   
 59: 5,6,7,8,3',4'-Hexamethoxyflavone;  $R_3=H, R_4=OCH_3, R_6=OCH_3, R_7=OCH_3, R_8=OCH_3, R_3'=OCH_3, R_4'=OCH_3, R_5'=H$   
 60: 3,5,6,7,8,3',4'-Heptamethoxyflavone;  $R_3=OCH_3, R_5=OCH_3, R_6=OCH_3, R_7=OCH_3, R_8=OCH_3, R_3'=OCH_3, R_4'=OCH_3, R_5'=H$   
 61: 5,6,7,4'-Tetramethoxyflavone;  $R_3=H, R_5=OCH_3, R_6=OCH_3, R_7=OCH_3, R_8=H, R_3'=H, R_4'=OCH_3, R_5'=H$   
 62: 5-Hydroxy-3,6,7,8,3',4'-hexamethoxyflavone;  $R_3=OCH_3, R_5=OH, R_6=OCH_3, R_7=OCH_3, R_8=OCH_3, R_3'=OCH_3, R_4'=OCH_3, R_5'=H$   
 63: 5-Hydroxy-3,6,7,8-tetramethoxyflavone;  $R_3=OCH_3, R_5=OH, R_6=OCH_3, R_7=OCH_3, R_8=OCH_3, R_3'=H, R_4'=H, R_5'=H$   
 64: 5,7,8,4'-Tetramethoxyflavone;  $R_3=H, R_5=OCH_3, R_6=H, R_7=OCH_3, R_8=OCH_3, R_3'=H, R_4'=OCH_3, R_5'=H$   
 65: 5,6,7,8,4'-Pentamethoxyflavone;  $R_3=H, R_5=OCH_3, R_6=OCH_3, R_7=OCH_3, R_8=OCH_3, R_3'=H, R_4'=OCH_3, R_5'=H$   
 66: 3-Hydroxy-5,6,7,8,3',4'-hexamethoxyflavone;  $R_3=OH, R_5=OCH_3, R_6=OCH_3, R_7=OCH_3, R_8=OCH_3, R_3'=OCH_3, R_4'=OCH_3, R_5'=H$   
 67: 5-Hydroxy-6,7,8,4'-tetramethoxyflavone;  $R_3=H, R_5=OH, R_6=OCH_3, R_7=OCH_3, R_8=OCH_3, R_3'=H, R_4'=OCH_3, R_5'=H$

**Coumarins**

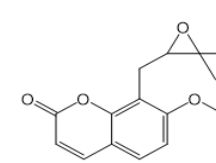

75: Meranzin  
80: Meranzin isomer

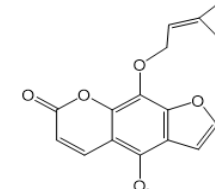

74: Pellopterin

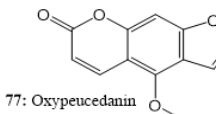

77: Oxypeucedanin

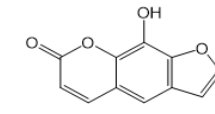

76: Xanthotoxol

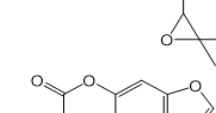

78: Scopoletin

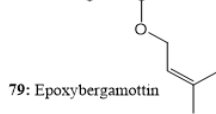

79: Epoxybergamottin

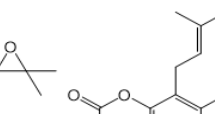

81: Osthol

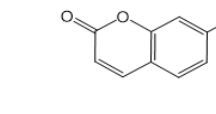

82: Auraptene

**Triterpenoids**

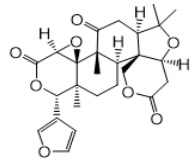

68: Limonin

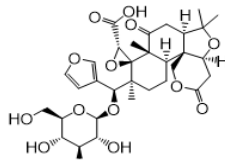

69: Limonin-17-beta-D-glucoside

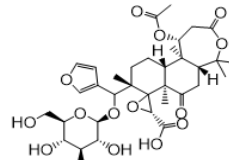

70: Nominin-17-beta-D-glucoside

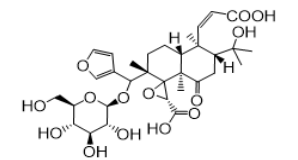

71: Obacunonic acid-17-beta-D-glucoside

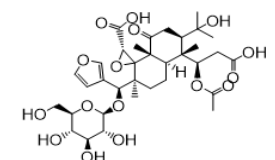

72: Nomialic acid-17-beta-D-glucoside

**Other compounds**

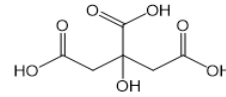

83: Citric acid

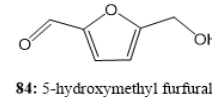

84: 5-hydroxymethyl furfural

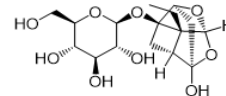

85: Paeoniflorin

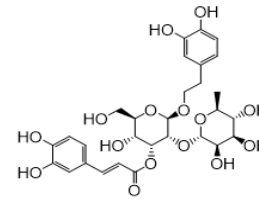

86: Magnolioside A

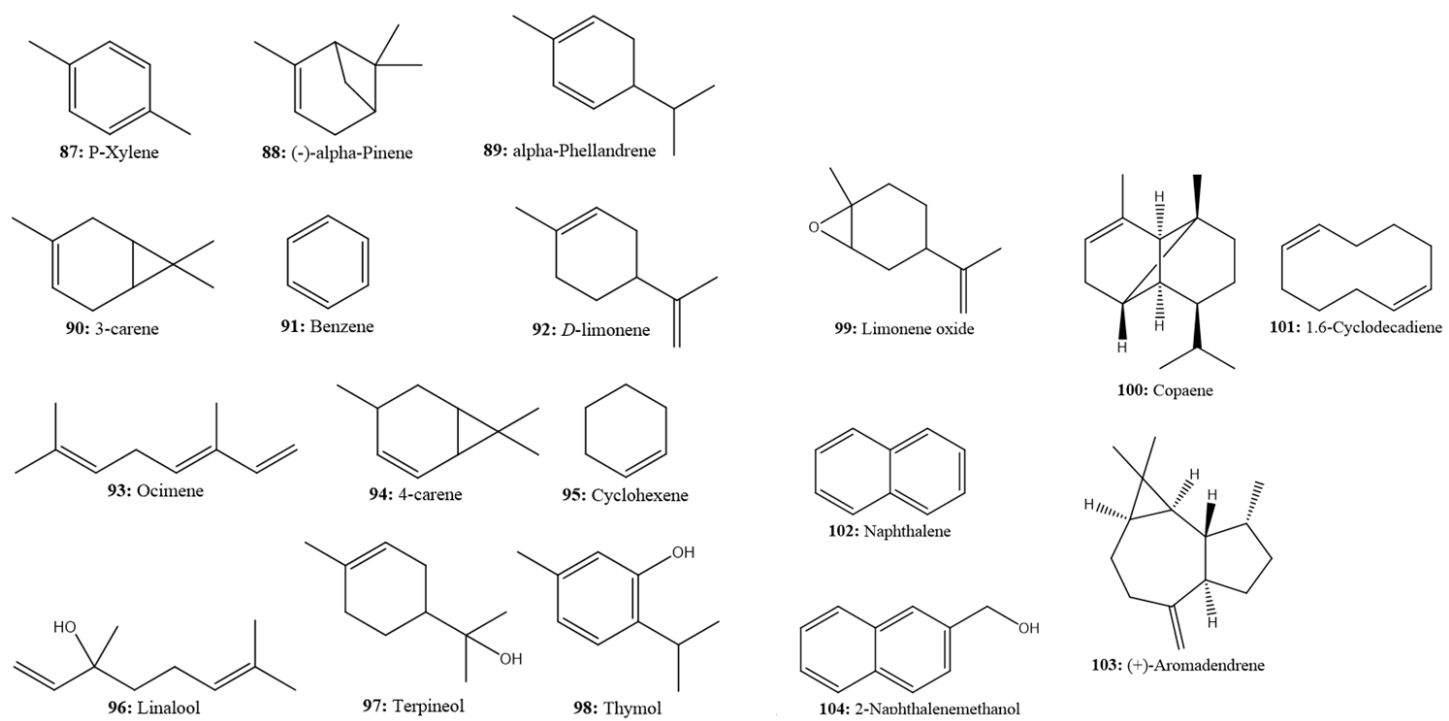

Figure S2. Structures of 18 compounds in volatile oils of *Aurantii fructus*.

**Table S1.** The 11 batches of *Aurantii fructus* obtained from different regions.

| Sample | Region                         | Variety                              | Geographical location (approximate) | Collection date |
|--------|--------------------------------|--------------------------------------|-------------------------------------|-----------------|
| S-1    | Sanyantang, Yuanjiang, Hunan   | <i>Citrus aurantium</i> L.           | N28°45', E112°21', 30m              | 2016.06.30      |
| S-2    | Fuqiushan, Taojiang, Hunan     | <i>Citrus aurantium</i> L.           | N28°28', E112°01', 30m              | 2016.07.25      |
| S-3    | Hesanqu, Yiyang, Hunan         | <i>Citrus aurantium</i> L.           | N28°34', E112°22', 100m             | 2017.07.10      |
| S-4    | Yangjixiang, Anren, Hunan      | <i>Citrus aurantium</i> L.           | N26°38', E113°13', 80m              | 2016.07.06      |
| S-5    | Yangjixiang, Anren, Hunan      | <i>Citrus aurantium</i> L.           | N26°38', E113°13', 80m              | 2016.07.06      |
| S-6    | Hunan agricultural university  | <i>Citrus aurantium</i> L.           | N28°11', E113°05', 60m              | 2016.07.25      |
| S-7    | Fenglinzheng, Zhuzhou, Hunan   | <i>Citrus aurantium</i> L.           | N27°47', E113°25', 70m              | 2016.07.24      |
| S-8    | Shenzhengqiao, Xingan, Jiangxi | <i>Citrus aurantium</i> L.           | N27°42', E115°28', 30m              | 2016.07.11      |
| S-9    | Shenzhengqiao, Xingan, Jiangxi | <i>Citrus aurantium</i> L.           | N27°42', E115°28', 30m              | 2016.07.11      |
| S-10   | Zhangshu, Jiangxi              | <i>Citrus aurantium</i> L.           | N28°03', E115°32', 30m              | 2016.08.25      |
| S-11   | Changsha, Hunan                | <i>Citrus aurantium</i> L. (variant) | N28°13', E112°56', 45m              | 2016.07.03      |

**Table S2.** Contents of chemical markers in *Aurantii fructus* from 11 different samples (mg/g)

| <b>Batches</b> | <b>S1</b> | <b>S2</b> | <b>S3</b> | <b>S4</b> | <b>S5</b> | <b>S6</b> | <b>S7</b> | <b>S8</b> | <b>S9</b> | <b>S10</b> | <b>S11</b> |
|----------------|-----------|-----------|-----------|-----------|-----------|-----------|-----------|-----------|-----------|------------|------------|
| Eriocitrin     | 2.07      | 1.56      | 1.35      | 2.13      | 2.10      | 0.82      | 0.76      | 0.08      | 1.13      | 1.33       | 0.98       |
| Neoeriocitrin  | 4.34      | 3.82      | 4.36      | 5.13      | 4.86      | 2.09      | 4.77      | 1.27      | 6.48      | 4.65       | 4.04       |
| Narirutin      | 9.15      | 7.15      | 6.40      | 7.10      | 7.12      | 6.98      | 3.78      | 2.90      | 2.87      | 5.44       | 8.40       |
| Naringin       | 106.81    | 101.97    | 97.59     | 96.91     | 98.44     | 82.35     | 96.13     | 100.68    | 89.98     | 92.35      | 80.40      |
| Hesperidin     | 6.51      | 8.44      | 6.79      | 5.60      | 6.03      | 9.77      | 5.68      | 7.37      | 5.10      | 7.98       | 38.14      |
| Neohesperidin  | 35.99     | 48.37     | 37.53     | 37.99     | 40.43     | 74.13     | 102.3     | 96.20     | 70.4      | 37.85      | 26.97      |
| Poncirin       | 5.32      | 8.22      | 8.09      | 6.25      | 7.35      | 9.23      | 7.59      | 9.40      | 3.73      | 7.35       | 1.80       |
| Naringenin     | 0.56      | 0.26      | 0.73      | 0.12      | 0.14      | 0.22      | 0.02      | 0.76      | 0.44      | 0.68       | 1.17       |
| Hesperetin     | 0.13      | 0.12      | 0.20      | 0.18      | 0.19      | 0.15      | 0.05      | 0.38      | 0.24      | 0.28       | 0.57       |
| Nobiletin      | 1.16      | 1.95      | 2.71      | 1.64      | 1.76      | 2.71      | 0.81      | 1.02      | 0.8       | 1.95       | 0.59       |
| Tangeretin     | 1.39      | 2.29      | 2.90      | 1.81      | 1.85      | 1.90      | 0.78      | 1.30      | 0.81      | 2.28       | 0.43       |
| Auraptene      | 1.22      | 1.71      | 2.13      | 1.36      | 1.67      | 0.42      | 0.43      | 0.15      | 0.35      | 2.00       | 0.36       |
| Total (mg/g)   | 174.65    | 185.86    | 170.78    | 166.22    | 171.94    | 190.77    | 223.1     | 221.51    | 182.33    | 164.14     | 163.85     |
